# Supplementary material for: Germinal Center B Cells Replace Their Antigen Receptors in Dark Zones and Fail Light Zone Entry when Immunoglobulin Gene Mutations are Damaging
Source: PubMed Central journal article supplement (PMC6162340; doi:10.1016/j.immuni.2018.08.025), 2018-09-18
Supplement: mmc1.pdf [file mmc1.pdf]

**Immunity, Volume 49**

**Supplemental Information**

**Germinal Center B Cells Replace Their Antigen  
Receptors in Dark Zones and Fail Light Zone Entry  
when Immunoglobulin Gene Mutations are Damaging**

**Isabelle Stewart, Daniel Radtke, Bethan Phillips, Simon J. McGowan, and Oliver Bannard**

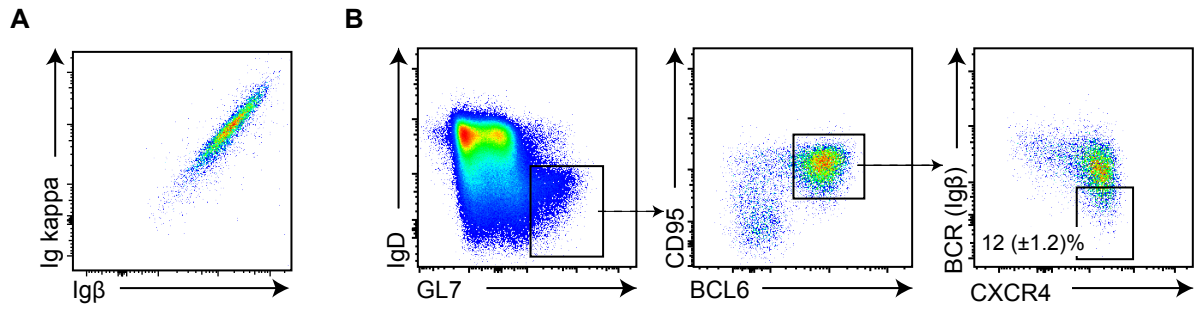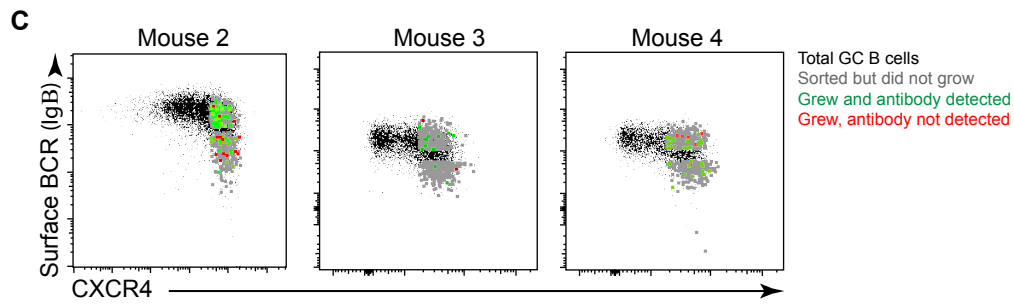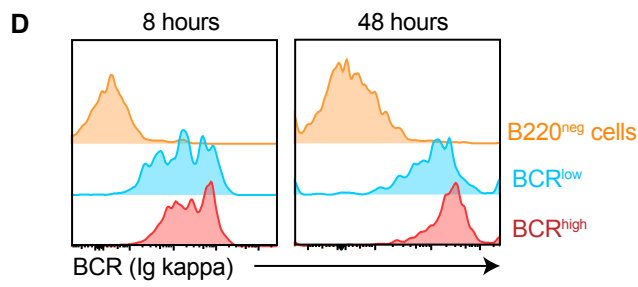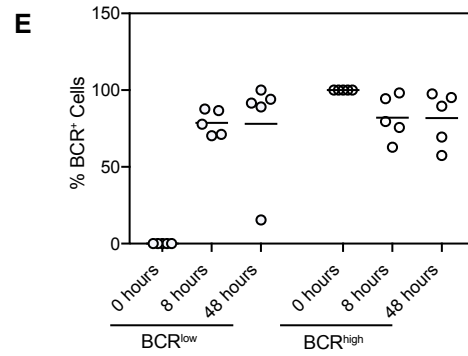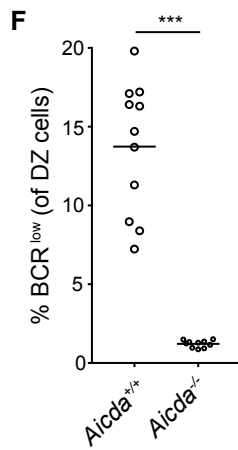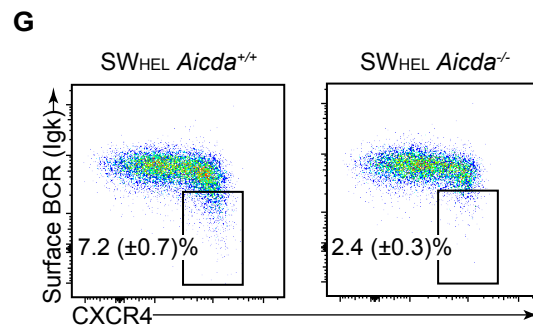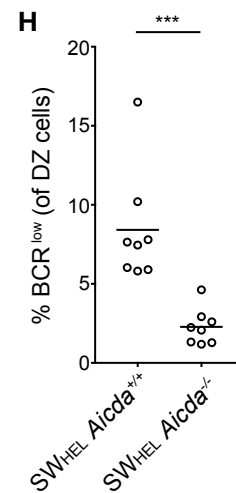

**Figure S1 (Related to Figure 1). Characterization of BCR<sup>low</sup> DZ cells.** (A) Surface Ig $\beta$  and Ig $\kappa$  light chain levels correlate in IgD<sup>low</sup> CD95<sup>+</sup> GL7<sup>+</sup> SW<sub>HEL</sub> GC B cells (day 7 HEL-OVA/adjuvant immunisation). (B) The CXCR4/BCR staining pattern on BCL6<sup>+</sup> GC B cells, gated as shown. (C) Results from individual repeat experiments, related to Figures 1F and 1G. Dot plots show BCR and CXCR4 levels on GC B cells at the time of sorting. (D) CXCR4<sup>high</sup> BCR<sup>high</sup> and CXCR4<sup>high</sup> BCR<sup>low</sup> GC B cells from SRBC immunised mice were sorted for 8 hrs alone, or for 48 hrs under “Nojima” conditions. BCR levels at the end of culture were determined by FACS and compared to that of non-B cells, with data summarised in (E). Labels indicate phenotype at time of sort/plating. (F) Frequencies of *Aicda*<sup>+/+</sup> and *Aicda*<sup>-/-</sup> CXCR4<sup>high</sup> CD83<sup>low</sup> DZ GC B cells that have low BCR levels in mixed BM chimeric mice on days 7 or 8 of response to SRBC immunisation, related to Figure 1H. (G), (H), Similar assessments were made for co-transferred *Aicda*<sup>+/+</sup> and *Aicda*<sup>-/-</sup> SW<sub>HEL</sub> GC B cells. (A), (B) show representative plot of 7 and 6 mice from 2 experiments, (D) is representative and (E) pooled from 5 mice in 2 experiments, (F) is pooled from 3 experiments and (G)-(H) are from 2 experiments. Numbers in (B), (G) represent mean +/- S.E.M., dots in (E), (F), (H) represent single mice. Analysis was performed using an unpaired two-tailed student's t-test, \*\*\*, P <0.001.

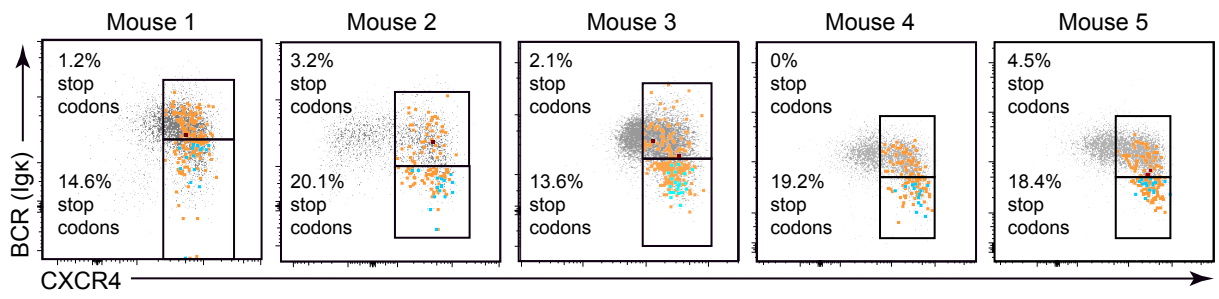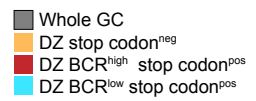

**Figure S2 (Related to Figure 2). Cells with premature stop codons accumulate in BCR<sup>low</sup> DZ subsets.** Individual repeats of indexed sequenced cells summarised in Figure 2C (with mouse 3 being the same animal as in Figure 2B). Colours indicate presence or absence of *Ighv* region premature stop codons in cells of the indicated phenotype. Frequencies of premature stop codons in BCR<sup>high</sup> and BCR<sup>low</sup> DZ gates are shown.

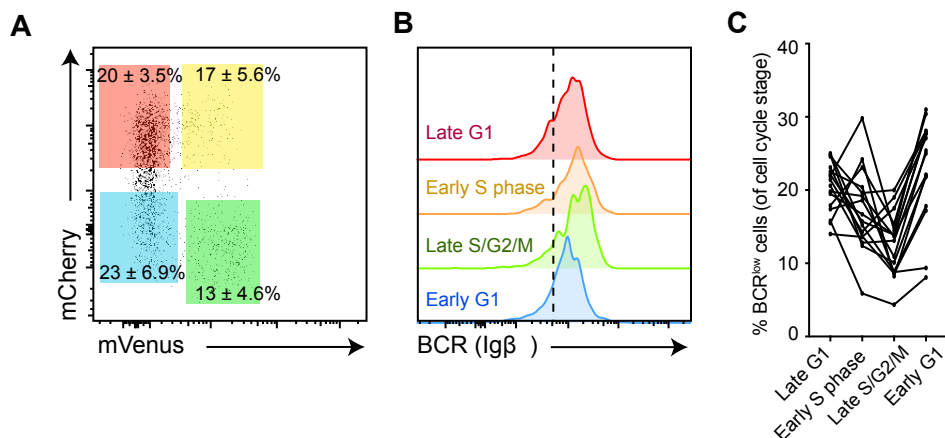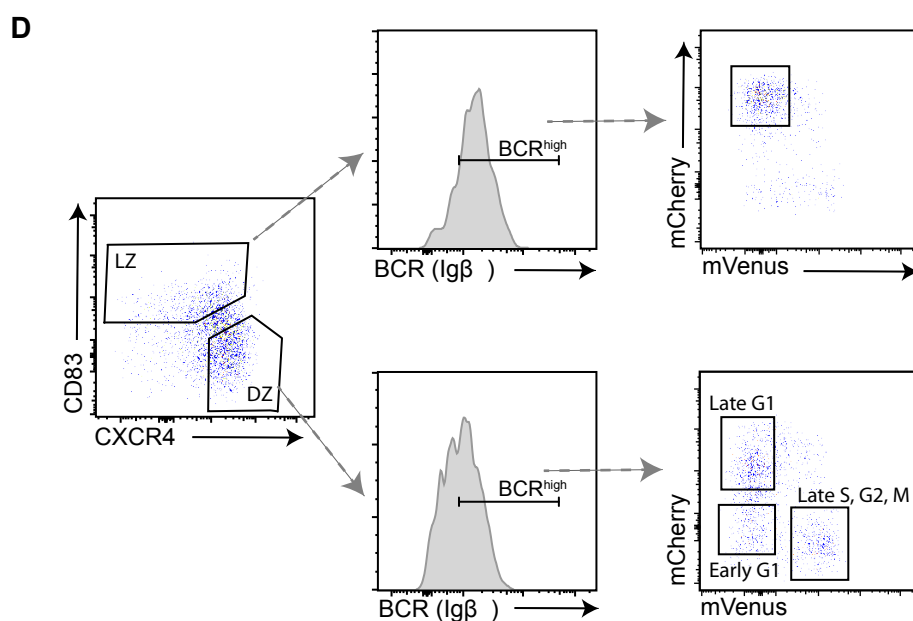

**E**                      Dark zone                      Light zone

|         | Dark zone    |              | Light zone    |              |
|---------|--------------|--------------|---------------|--------------|
|         | early G1     | late G1      | late S, G2, M | Late G1      |
| Mouse 1 | 1.6<br>(180) | 0.3<br>(205) | 0.0<br>(307)  | 2.8<br>(500) |
| Mouse 2 | 0.0<br>(346) | 2.7<br>(422) | 0.0<br>(473)  | 0.0<br>(500) |
| Mouse 3 | 0.0<br>(200) | 1.6<br>(200) | 0.0<br>(500)  | 0.0<br>(500) |
| Mouse 4 | 0.0<br>(250) | 1.2<br>(250) | 0.0<br>(500)  | 0.0<br>(500) |
| Mouse 5 | 5.7<br>(250) | 0.0<br>(500) | 0.0<br>(500)  | 0.0<br>(500) |
| Mouse 6 | 0.0<br>(500) | 0.0<br>(500) | 0.0<br>(466)  | 0.0<br>(500) |
| Mouse 7 | 0.0<br>(127) | 0.0<br>(329) | 0.0<br>(260)  | 0.0<br>(305) |

**Figure S3 (Related to Figure 3). BCR<sup>low</sup> cells are present at all cell cycle stages in the DZ but SHM may occur preferentially in G1.** The BCR<sup>low</sup> state is not restricted to certain cell cycle stages in the dark zone. SW<sub>HELX</sub>Fucci2 DZ (CXCR4<sup>high</sup> CD83<sup>low</sup>) GC B cells (IgD<sup>low</sup> GL7<sup>+</sup> CD45.1 or 2<sup>+</sup> or CD95<sup>+</sup> GL7<sup>+</sup> CD45.1 or 2<sup>+</sup>) 8 days after immunisation with HEL-OVA/adjuvant were gated for their cell cycle status (A) and BCR levels determined (B). Dashed line marks BCR<sup>low</sup> gating. Summary of results from multiple mice and experiments are shown in (C) with each line of connected dots representing results from a single animal. (D) Representative gates used to sort BCR<sup>high</sup> cells at different cell cycle stages for bulk population based NGS analysis of stop codon presence. (E) The frequency of stop codons detected within each population is shown, with the lower numbers in brackets indicating population sizes sorted from each gate and mouse. Numbers in (A) are means +/- S.D., and (B) is representative of, 13 mice. Six *Aicda*<sup>-/-</sup> control populations were included in (E) and showed the expected patterns of zero stop codons (not shown).

**A. i.**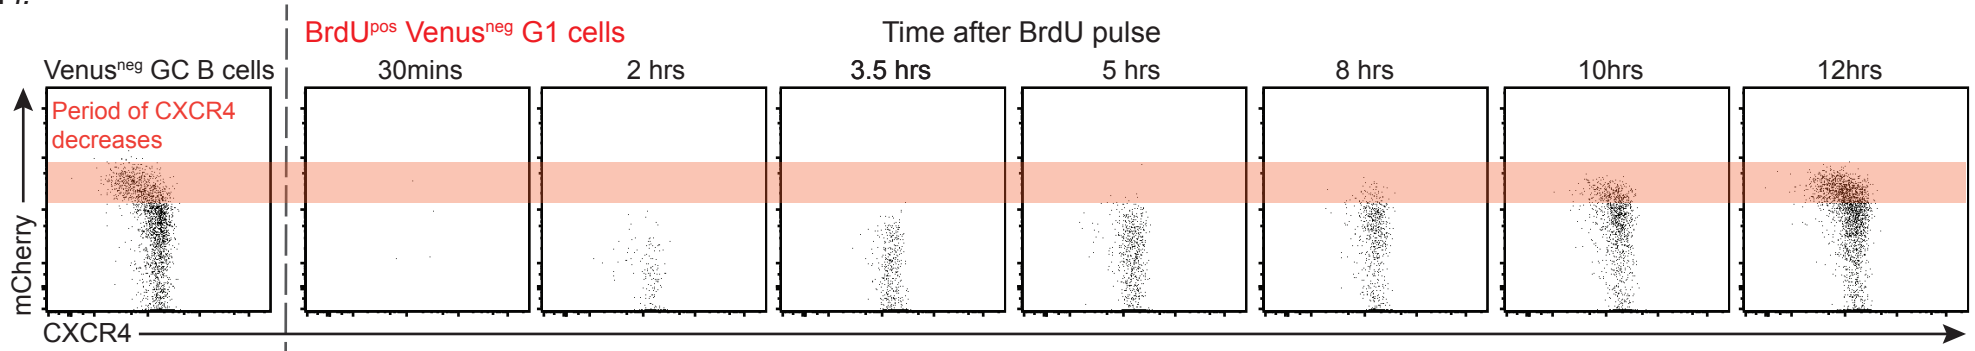**ii.**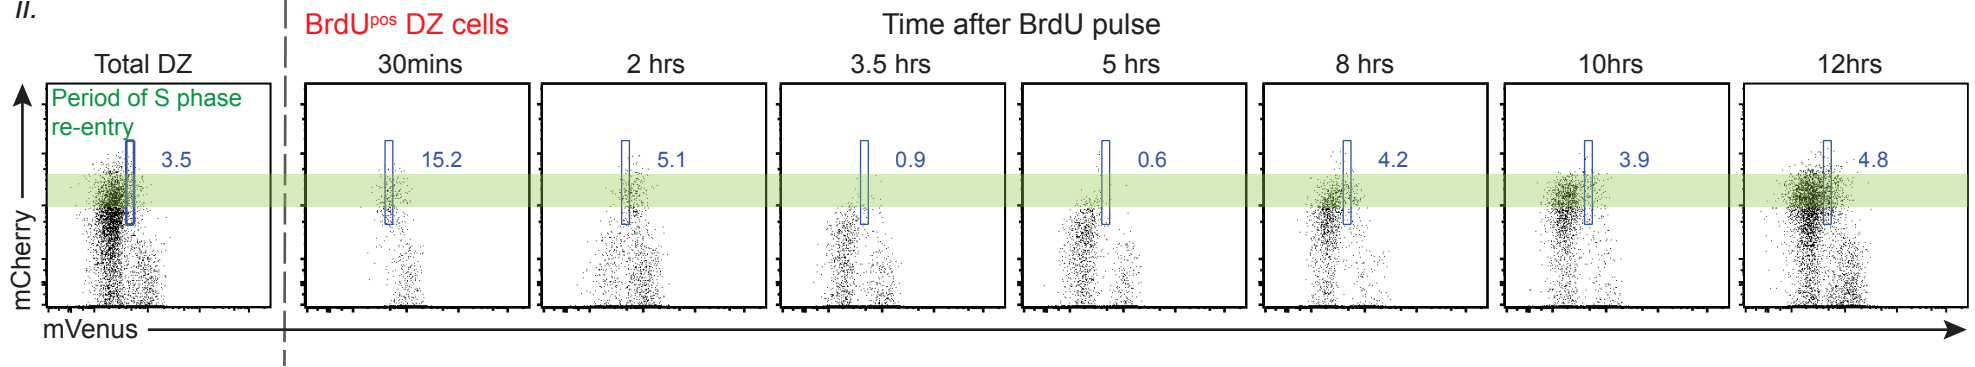**B.**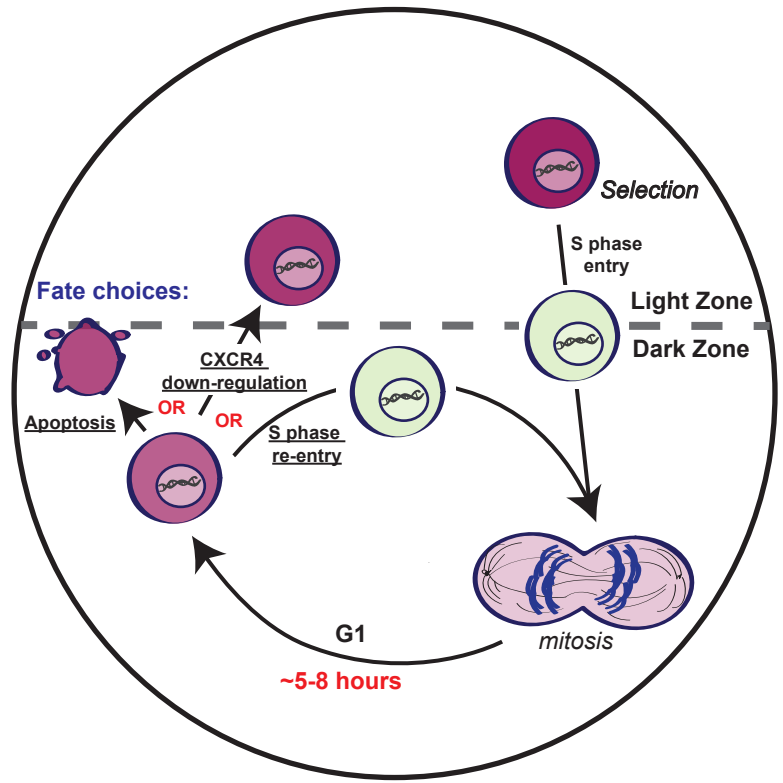



**Figure S4 (Related to Figure 5). The temporal relationship between G1 sub-stage and S phase re-entry, or CXCR4 reductions, by DZ cells.** (A) Fucci2 mice were immunised with SRBCs and received single BrdU injections at the indicated time points before analysis on day 10. Plots to left of dash show whole populations irrespective of whether they are BrdU<sup>+</sup> or BrdU<sup>neg</sup>, plots to right of dash show just BrdU<sup>+</sup> cells. (i) mVenus (G1) GC B cells were gated to determine the timing of surface CXCR4 decreases after the last cellular division. (ii) CXCR4<sup>high</sup> CD83<sup>low</sup> DZ cells were gated. Orange (i) and green (ii) shaded areas indicate ranges of mCherry at which CXCR4 level reductions or S phase re-entry occurs. Very early S phase DZ cells are gated (blue rectangles) in (ii). (B) Cartoon illustrating fate decisions in the GC. “Selected” cells enter S phase in the LZ and complete this first division in the DZ before spending a period of approximately 5-8 hrs in G1. Late G1 DZ cells commit to one of three fates; initiation of another cell division, reduce their CXCR4 levels in preparation for migration to the LZ, or death by apoptosis. Data in (A) are representative of 4-5 mice per time point from 2 independent experiments.

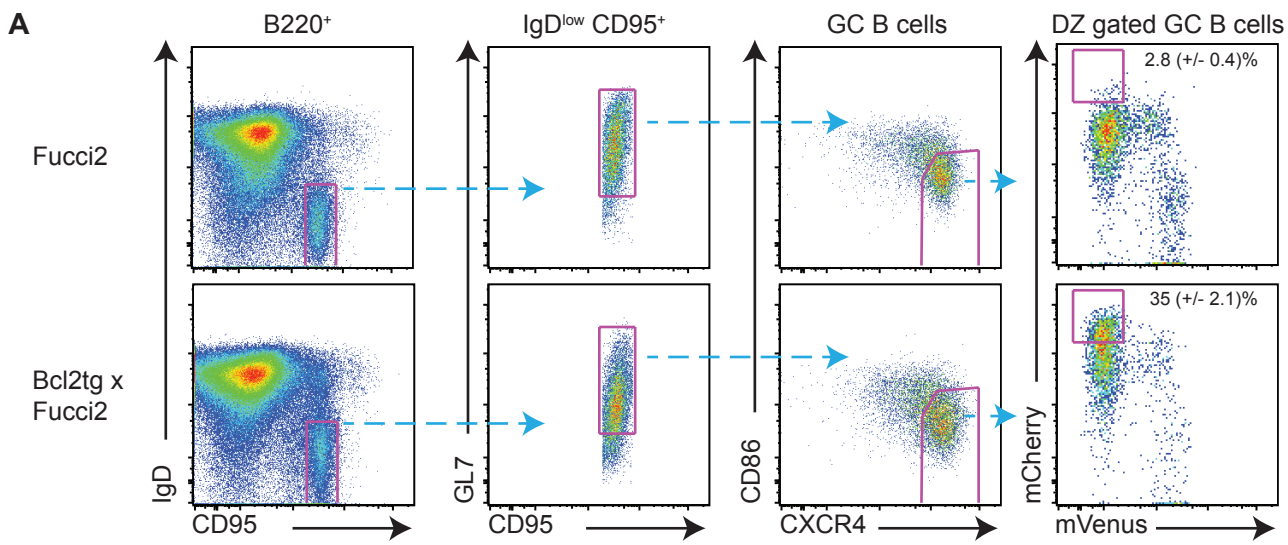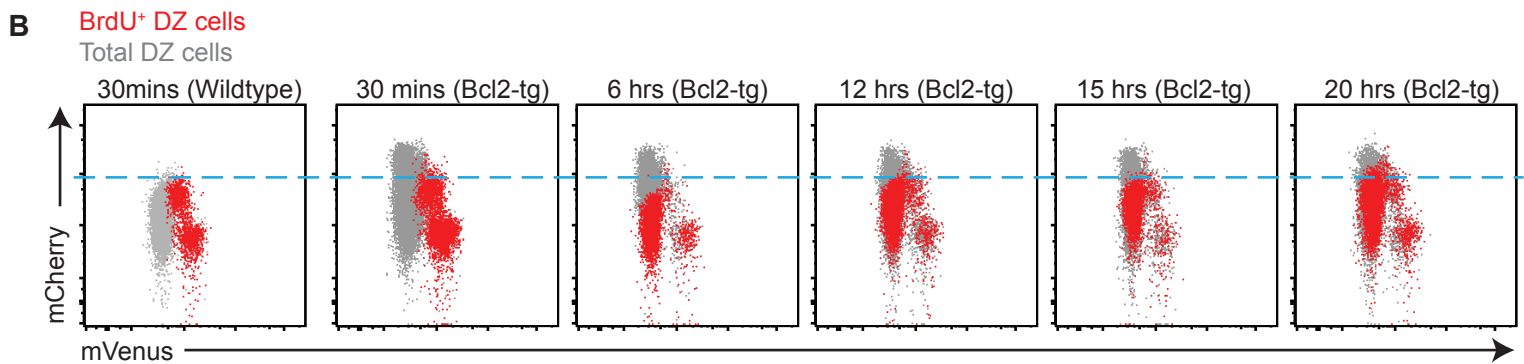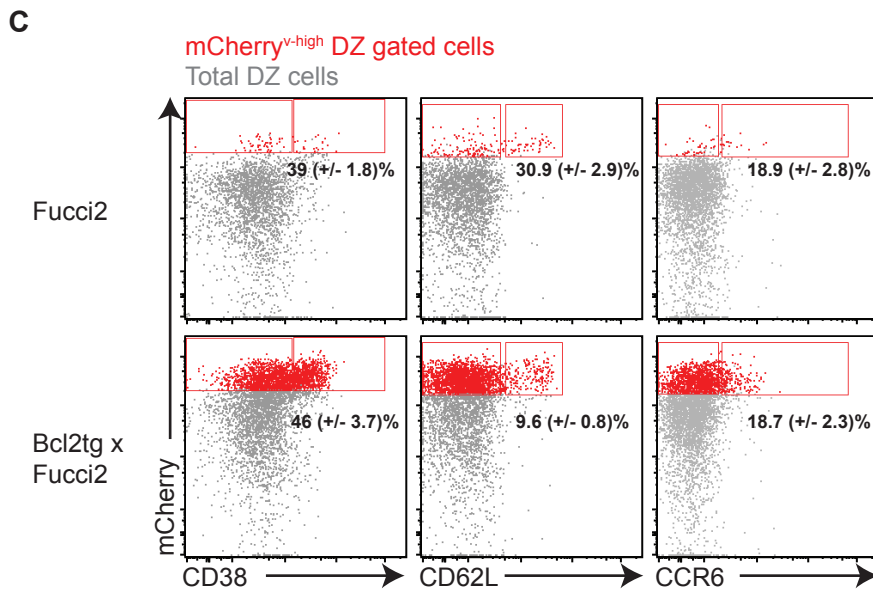

**D** Total GC B cells

Follicular B cells

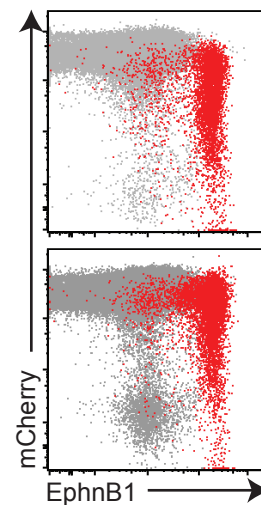

**E**

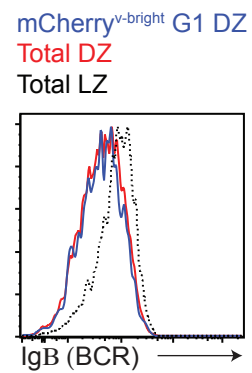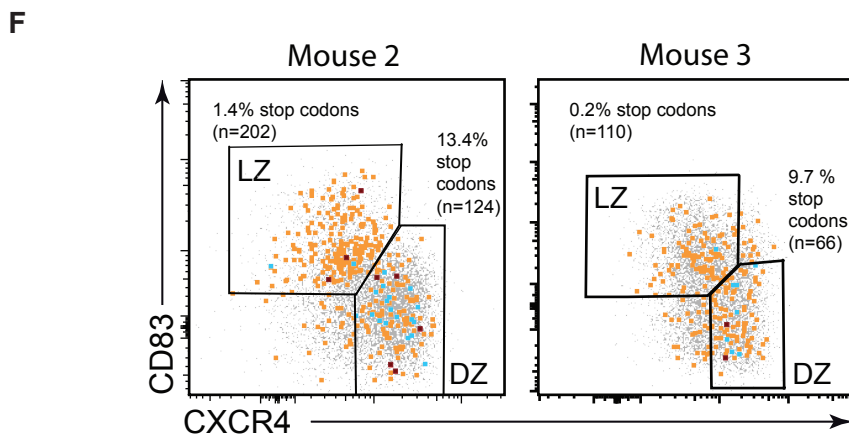

Whole GC

Stop codon<sup>neg</sup>

BCR<sup>high</sup> stop codon<sup>pos</sup>

BCR<sup>low</sup> stop codon<sup>pos</sup>

**G**

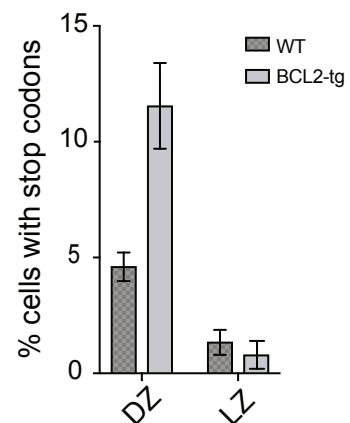

**Figure S5 (Related to Figure 6). Aberrant quiescent populations exist in the DZs of Bcl2-tg mice.** Splenic GC B cells from SRBC immunised wildtype or Bcl2-tg mice carrying the Fucci2 allele were gated and mCherry levels within DZ cells were determined (A). (B) Mice received single BrdU injections at the indicated time points before analysis. BrdU<sup>+</sup> DZ cells (red) are overlaid with total DZ cells (grey). The blue dashed bar (equivalent to maximal mCherry levels in WT DZ cells) and is shown for reference. Levels of the various pre-memory markers (C), and the GC and pre-memory associated receptor Ephrin B1 (D), were determined in mCherry<sup>v-bright</sup> DZ cells (red) and were overlaid with the total DZ population for reference (grey). Numbers indicate frequency of mCherry<sup>v-bright</sup> mVenus<sup>neg</sup> (red) cells that were positive for indicated protein. (E) BCR levels in GC B populations (CD38<sup>low</sup> IgD<sup>low</sup> GL7<sup>+</sup>) of the indicated phenotype. GC DZ/LZ cells were gated using CXCR4 and CD83 for this experiment. (F) Individual repeats of indexed sequenced SW<sub>HEL</sub> x Bcl2-tg cells that are summarised in Figure 6E. Colours indicate presence or absence of premature stop codons in cells of the indicated phenotype. Frequencies of premature stop codons in DZ and LZ gates are shown, with numbers of cells sequenced shown in brackets. (G) Summary of frequency of stop codons in DZ and LZ of WT (from Figure 4, n=5) and BCL2-tg (n=2) SW<sub>HEL</sub> GC B cells. Error bars, S.E.M.. Numbers in (A, C, D) are means (+/- S.E.M.) of 6 (WT) and 10 (Bcl2-tg) mice from 2 experiments. Each plot in (B) is from representative of 3-4 mice at each time point from 2 experiments and plots in (E) are representative from 3 experiments each containing 2-3 mice.
